# Supplementary material for: Living in the waterfalls: A new species of Trichomycterus (Siluriformes: Trichomycteridae) from Tabay stream, Misiones, Argentina
Source: PubMed Central journal article supplement (PMC5480901; doi:10.1371/journal.pone.0179594), 2017-06-22
Supplement: pone.0179594.s002.pdf [file pone.0179594.s002.pdf]

**S2 Appendix with additional morphometric and meristic tables.**

**Table 3.** Morphometric data for *Trichomycterus ytororo*: holotype and paratypes (n = 12). Measurements are expressed in percent of standard length or head length.

|                                           | <b>1</b> | <b>2</b> | <b>3</b> | <b>4</b> | <b>5</b> | <b>6</b> | <b>7</b> | <b>8</b> | <b>9</b> | <b>10<br/>(holotype)</b> | <b>11</b> | <b>12</b> |
|-------------------------------------------|----------|----------|----------|----------|----------|----------|----------|----------|----------|--------------------------|-----------|-----------|
| Standard length (mm)                      | 67.3     | 60.9     | 64.6     | 79.2     | 65.3     | 61.0     | 79.4     | 81.2     | 103.8    | 94.2                     | 107.3     | 85.3      |
| Percent of standard length                |          |          |          |          |          |          |          |          |          |                          |           |           |
| Head length                               | 22.5     | 21.4     | 21.8     | 19.7     | 21.2     | 21.9     | 20.5     | 21.4     | 20.0     | 20.1                     | 20.0      | 20.7      |
| Predorsal length                          | 63.5     | 60.2     | 63.9     | 62.0     | 62.3     | 61.7     | 62.2     | 62.1     | 62.0     | 60.5                     | 61.3      | 61.4      |
| Prepelvic length                          | 58.5     | 55.6     | 57.6     | 56.3     | 56.9     | 56.6     | 54.9     | 57.2     | 55.5     | 55.2                     | 56.3      | 56.9      |
| Preanal length                            | 73.8     | 67.7     | 73.2     | 70.9     | 72.4     | 71.8     | 70.5     | 71.8     | 70.9     | 69.9                     | 71.2      | 71.9      |
| Scapular girdle width                     | 17.6     | 18.0     | 17.5     | 16.6     | 17.5     | 18.3     | 17.4     | 17.1     | 17.2     | 17.2                     | 16.1      | 17.0      |
| Trunk length                              | 34.7     | 38.3     | 39.3     | 37.3     | 37.3     | 37.8     | 38.3     | 38.7     | 39.3     | 36.6                     | 38.6      | 38.5      |
| Pectoral-fin length                       | 11.3     | 11.5     | 10.2     | 11.1     | 12.4     | 10.2     | 12.0     | 11.5     | 10.5     | 10.7                     | 11.1      | 10.2      |
| Pelvic-fin length                         | 9.7      | 9.0      | 8.4      | 8.2      | 9.3      | 8.8      | 8.6      | 9.2      | 7.9      | 8.3                      | 8.4       | 8.4       |
| Distance between pelvic-fin base and anus | 9.2      | 8.5      | 8.2      | 8.3      | 8.3      | 9.9      | 8.7      | 8.3      | 9.0      | 8.9                      | 9.2       | 10.2      |
| Caudal peduncle length                    | 21.6     | 20.3     | 20.6     | 21.4     | 20.9     | 22.4     | 22.2     | 21.6     | 22.6     | 23.4                     | 22.7      | 21.2      |
| Caudal peduncle depth                     | 16.8     | 16.1     | 16.6     | 17.0     | 16.9     | 17.7     | 16.9     | 17.3     | 18.1     | 18.2                     | 17.9      | 15.6      |
| Body depth                                | 19.3     | 18.7     | 19.5     | 19.1     | 19.5     | 19.9     | 19.4     | 19.3     | 19.3     | 19.9                     | 20.4      | 18.0      |
| Length of dorsal-fin base                 | 11.6     | 12.1     | 12.1     | 11.5     | 12.3     | 12.2     | 12.2     | 11.8     | 12.6     | 12.2                     | 11.3      | 11.5      |
| Length of anal-fin base                   | 8.5      | 10.4     | 9.3      | 8.4      | 9.3      | 8.7      | 9.0      | 8.6      | 8.3      | 8.9                      | 8.3       | 9.5       |
| Percent of head length                    |          |          |          |          |          |          |          |          |          |                          |           |           |
| Head width                                | 82.3     | 86.6     | 87.0     | 92.5     | 94.7     | 85.9     | 85.2     | 88.5     | 91.1     | 92.7                     | 90.5      | 84.2      |
| Nasal barbel length                       | 30.4     | 31.2     | 31.0     | 25.4     | 33.9     | 30.3     | 26.1     | 33.3     | 22.5     | 29.2                     | 29.0      | 28.0      |
| Maxillary barbel length                   | 33.3     | 33.8     | 31.4     | 23.1     | 30.2     | 26.5     | 28.0     | 33.1     | 25.7     | 32.2                     | 31.4      | 33.6      |
| Rictal barbel length                      | 25.0     | 30.5     | 36.6     | 26.9     | 36.0     | 28.3     | 29.4     | 29.9     | 28.1     | 28.0                     | 28.6      | 30.5      |
| Snout length                              | 36.5     | 40.8     | 42.4     | 41.6     | 42.0     | 36.9     | 40.9     | 40.8     | 40.6     | 42.4                     | 42.6      | 41.8      |
| Interorbital                              | 19.1     | 19.8     | 22.9     | 21.4     | 21.1     | 22.0     | 21.0     | 22.2     | 23.9     | 21.2                     | 23.4      | 24.4      |
| Mouth width                               | 29.7     | 33.8     | 31.1     | 33.5     | 31.8     | 26.8     | 32.3     | 32.2     | 34.5     | 32.4                     | 34.2      | 30.7      |
| Eye diameter                              | 13.3     | 14.7     | 14.3     | 14.5     | 16.1     | 13.5     | 13.5     | 12.8     | 11.3     | 12.6                     | 11.8      | 13.4      |
| Supra-orbital pore distance               | 10.4     | 12.4     | 8.6      | 9.2      | 6.8      | 11.9     | 14.0     | 11.8     | 12.2     | 11.8                     | 8.8       | 9.0       |

**Table 4.** Morphometric data for *Trichomycterus ytororo*: holotype and paratypes (n = 12). Measurements are expressed in mm.

|                                           | 1    | 2    | 3    | 4    | 5    | 6    | 7    | 8    | 9     | 10<br>holotype | 11.0  | 12.0 |
|-------------------------------------------|------|------|------|------|------|------|------|------|-------|----------------|-------|------|
| Standard length (mm)                      | 67.3 | 60.9 | 64.6 | 79.2 | 65.3 | 61.0 | 79.4 | 81.2 | 103.8 | 94.2           | 107.3 | 85.3 |
| Head length                               | 15.2 | 13.1 | 14.1 | 15.6 | 13.8 | 13.4 | 16.3 | 17.4 | 20.8  | 18.9           | 21.5  | 17.7 |
| Predorsal length                          | 42.7 | 36.7 | 41.2 | 49.1 | 40.7 | 37.6 | 49.4 | 50.4 | 64.3  | 57.0           | 65.7  | 52.4 |
| Prepelvic length                          | 39.3 | 33.9 | 37.2 | 44.6 | 37.2 | 34.5 | 43.6 | 46.5 | 57.6  | 52.0           | 60.4  | 48.6 |
| Preanal length                            | 49.6 | 41.3 | 47.3 | 56.2 | 47.3 | 43.8 | 56.0 | 58.3 | 73.6  | 65.8           | 76.4  | 61.3 |
| Scapular girdle width                     | 11.8 | 11.0 | 11.3 | 13.2 | 11.4 | 11.1 | 13.9 | 13.9 | 17.8  | 16.2           | 17.3  | 14.5 |
| Trunk length                              | 23.3 | 23.4 | 25.4 | 29.5 | 24.3 | 23.1 | 30.4 | 31.4 | 40.8  | 34.4           | 41.4  | 32.9 |
| Pectoral-fin length                       | 7.6  | 7.0  | 6.6  | 8.8  | 8.1  | 6.2  | 9.5  | 9.3  | 11.0  | 10.1           | 12.0  | 8.7  |
| Pelvic-fin length                         | 6.5  | 5.5  | 5.4  | 6.5  | 6.1  | 5.4  | 6.9  | 7.5  | 8.2   | 7.8            | 9.1   | 7.2  |
| Distance between pelvic-fin base and anus | 6.2  | 5.2  | 5.3  | 6.6  | 5.4  | 6.0  | 6.9  | 6.7  | 9.3   | 8.4            | 9.9   | 8.7  |
| Caudal peduncle length                    | 14.5 | 12.4 | 13.3 | 16.9 | 13.7 | 13.6 | 17.6 | 17.6 | 23.5  | 22.0           | 24.3  | 18.1 |
| Caudal peduncle depth                     | 11.3 | 9.8  | 10.7 | 13.5 | 11.0 | 10.8 | 13.4 | 14.0 | 18.8  | 17.1           | 19.2  | 13.3 |
| Body depth                                | 13.0 | 11.4 | 12.6 | 15.2 | 12.7 | 12.2 | 15.4 | 15.7 | 20.1  | 18.8           | 21.9  | 15.4 |
| Length of dorsal-fin base                 | 7.8  | 7.4  | 7.8  | 9.1  | 8.0  | 7.4  | 9.7  | 9.6  | 13.1  | 11.5           | 12.1  | 9.9  |
| Length of anal-fin base                   | 5.8  | 6.3  | 6.0  | 6.7  | 6.1  | 5.3  | 7.1  | 7.0  | 8.6   | 8.4            | 8.9   | 8.1  |
| Head width                                | 12.5 | 11.3 | 12.2 | 14.5 | 13.1 | 11.5 | 13.9 | 15.4 | 18.9  | 17.5           | 19.5  | 14.9 |
| Nasal barbel length                       | 4.6  | 4.1  | 4.4  | 4.0  | 4.7  | 4.1  | 4.3  | 5.8  | 4.7   | 5.5            | 6.2   | 4.9  |
| Maxillary barbel length                   | 5.0  | 4.4  | 4.4  | 3.6  | 4.2  | 3.5  | 4.6  | 5.8  | 5.4   | 6.1            | 6.7   | 5.9  |
| Rictal barbel length                      | 3.8  | 4.0  | 5.2  | 4.2  | 5.0  | 3.8  | 4.8  | 5.2  | 5.9   | 5.3            | 6.1   | 5.4  |
| Snout length                              | 5.5  | 5.3  | 6.0  | 6.5  | 5.8  | 4.9  | 6.7  | 7.1  | 8.5   | 8.0            | 9.1   | 7.4  |
| Interorbital                              | 2.9  | 2.6  | 3.2  | 3.4  | 2.9  | 2.9  | 3.4  | 3.9  | 5.0   | 4.0            | 5.0   | 4.3  |
| Mouth width                               | 4.5  | 4.4  | 4.4  | 5.2  | 4.4  | 3.6  | 5.3  | 5.6  | 7.2   | 6.1            | 7.3   | 5.4  |
| Eye diameter                              | 2.0  | 1.9  | 2.0  | 2.3  | 2.2  | 1.8  | 2.2  | 2.2  | 2.3   | 2.4            | 2.5   | 2.4  |
| Supra-orbital pore distance               | 1.4  | 1.4  | 1.8  | 1.4  | 1.3  | 0.9  | 1.9  | 2.4  | 2.5   | 2.3            | 2.5   | 1.6  |

**Table 5.** Meristic data for *Trichomycterus ytororo*: holotype and paratypes (n = 12).

|                                    | <b>1</b> | <b>2</b> | <b>3</b> | <b>4</b> | <b>5</b> | <b>6</b> | <b>7</b> | <b>8</b> | <b>9</b> | <b>10<br/>(holotype)</b> | <b>11</b> | <b>12</b> |
|------------------------------------|----------|----------|----------|----------|----------|----------|----------|----------|----------|--------------------------|-----------|-----------|
| Dorsal fin rays                    | ii,7     | ii,7     | ii,7     | ii,7     | ii,7     | ii,7     | ii,7     | ii,7     | ii,7     | ii,7                     | ii,7      | ii,7      |
| Pectoral fin rays                  | i,7      | i,7      | i,7      | i,7      | i,7      | i,7      | i,7      | i,7      | i,7      | i,7                      | i,7       | i,7       |
| Pelvic fin rays                    | i,4      | i,4      | i,4      | i,4      | i,4      | i,4      | i,4      | i,4      | i,4      | i,4                      | i,4       | i,4       |
| Anal fin rays                      | i,5      | i,5      | i,5      | i,5      | i,5      | i,5      | i,5      | i,5      | i,5      | i,5                      | i,5       | i,5       |
| Rays in the upper hypural plate    | i,5      | i,5      | i,5      | i,5      | i,5      | i,5      | i,5      | i,5      | i,5      | i,5                      | i,5       | i,5       |
| Rays in the lower hypural plate    | i,7      | i,6      | i,7      | i,7      | i,6      | i,6      | i,7      | i,7      | i,7      | i,6                      | i,6       | i,6       |
| Dorsal procurrent caudal-fin rays  | 35       | 35       | 31       | 34       | 33       | 33       | 33       | 32       | 35       | 35                       | 31        | ?         |
| Ventral procurrent caudal-fin rays | 13       | 13       | 13       | 13       | 13       | 13       | 13       | 13       | 13       | 13                       | 13        | ?         |
| Vertebrae                          | 38       | 38       | 38       | 38       | 37       | 37       | 37       | 37       | 38       | 38                       | 38        | ?         |
| Ribs                               | 11       | 11       | 12       | 11       | 12       | 11       | 12       | 11       | 12       | 11                       | 11        | ?         |
